# Supplementary material for: On the nitroxide mediated polymerization of methacrylates derived from bio-sourced terpenes in miniemulsion, a step towards sustainable products
Source: Royal Society of Chemistry journal article supplement (doi:10.1039/c9py01667h), 2019-12-17
Supplement: c9py01667h1.pdf [file c9py01667h1.pdf]

## Supporting Information

### On the nitroxide mediated polymerization of methacrylates derived from bio-sourced terpenes in miniemulsion

Sayrung Noppalit <sup>a,b,c</sup>, Alexandre Simula <sup>a</sup>, Laurent Billon <sup>b,c\*</sup> and José M. Asua <sup>a\*</sup>

<sup>a</sup> POLYMAT, University of the Basque Country UPV/EHU, Kimika Aplikatua saila, Kimika Zientzien Fakultatea, Joxe Mari Korta Zentroa, Tolosa Hiribidea 72, 20018 Donostia-San Sebastián, Spain

<sup>b</sup> CNRS, Université de Pau et des Pays de l'Adour E2S UPPA, IPREM, UMR 5254, Hélioparc Pau-Pyrénées, 2 avenue Président Angot, 64053 PAU CEDEX 9, France

<sup>c</sup> Université de Pau et des Pays de l'Adour, Bio-inspired Materials Group : functionality & self-assembly, Hélioparc Pau-Pyrénées, 2 avenue Président Angot, 64053 PAU CEDEX 9, France

#### Monomer synthesis

##### Tetrahydrogeraniol methacrylate (THGMA)

A mixture of tetrahydrogeraniol (28.5 g, 0.18 mol), methacrylic acid (25.81 g, 0.30 mol), 2-Methyltetrahydrofuran (250 mL) and propylphosphonic anhydride (57 g, 0.18 mol) and triethylamine (16 g, 0.164 mol) were mixed in the 500 mL round bottom flask and stirred at room temperature for 24 hours. To this mixture, water was added first and the product was then extracted with diethyl ether. Then, the organic phase was washed several times with brine and deionized water. The organic phase was passed through basic alumina and the volatile solvent was removed by rotary evaporation to yield a transparent viscous liquid (35 g, 85 % yield). The <sup>1</sup>H NMR (CDCl<sub>3</sub>, 400 MHz) of the monomer is shown in Figure 1, 6.12 (a) (m, 1H, **CH**<sub>2</sub>=CH-C=O), 5.56 (b) (p, 1H, **CH**<sub>2</sub>=C-(CH<sub>3</sub>)(C=O), 4.21 (d) (ddt, 2H, O=C-O-**CH**<sub>2</sub>), 1.96 (c) (t, 3H, CH<sub>2</sub>=C-**CH**<sub>3</sub>), 1.73 (k) (ddt, 1H, (CH<sub>3</sub>)<sub>2</sub>-**CH**-CH<sub>2</sub>), 1.55 (e) (m, 2H, CH-**CH**<sub>2</sub>-CH<sub>2</sub>-O), 1.54 (f) (m, 1H, CH<sub>3</sub>-**CH**-CH<sub>2</sub>), 1.31 (i) (m, 2H, CH<sub>2</sub>-**CH**<sub>2</sub>-CH<sub>2</sub>-CH), 1.18 (h) (m, 2H, **CH**<sub>2</sub>-CH<sub>2</sub>-CH<sub>2</sub>-CH), 1.18 (J) (m, 2H, CH<sub>2</sub>-CH<sub>2</sub>-**CH**<sub>2</sub>-CH), 0.92 (g) (dd, 3H, **CH**<sub>3</sub>-CH-CH<sub>2</sub>-CH<sub>2</sub>), 0.91 (l) (dd, 6H, (**CH**<sub>3</sub>)<sub>2</sub>-CH-CH<sub>2</sub>-CH<sub>2</sub>).

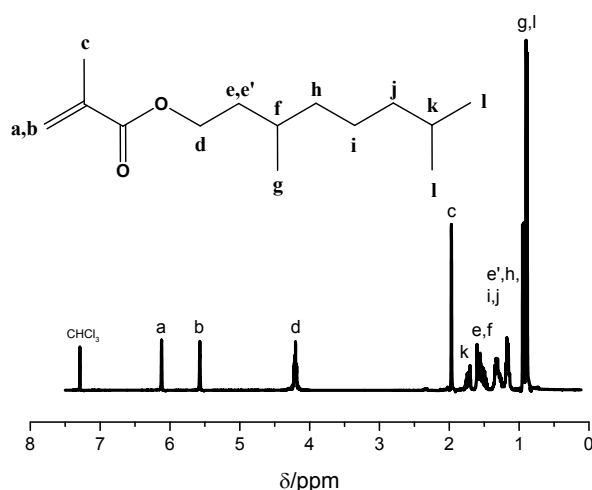

**Figure S1.**  $^1\text{H}$ -NMR of THGMA monomer.

### Cyclademol methacrylate (CDMMA)

A mixture of cyclademol (28.12 g, 0.18 mol), methacrylic acid (25.81 g, 0.30 mol), 2-Methyltetrahydrofuran (250 mL) and propylphosphonic anhydride (57 g, 0.18 mol) and triethylamine (16 g, 0.164 mol) were mixed in the 500 mL round bottom flask and stirred at room temperature for 24 hours. To this mixture, water was added first and the product was then extracted with diethyl ether. Then, the organic phase was washed several times with brine and deionized water. The organic phase was passed through basic alumina and the volatile solvent was removed by rotary evaporation to yield a transparent viscous liquid (33 g, 82 % yield). The  $^1\text{H}$  NMR ( $\text{CDCl}_3$ , 400 MHz) of the monomer is shown in Figure 2, 6.1 (a) (s, 1H,  $\text{O}=\text{C}-\text{C}(\text{CH}_3)=\text{CH}_2$ ), 5.5 (b) (s, 1H,  $\text{O}=\text{C}-\text{C}(\text{CH}_3)=\text{CH}_2$ ), 4.7 (d) (m, 1H,  $\text{CH}-\text{O}-\text{C}=\text{O}$ ), 1.95 (c, f) (s, 4H,  $\text{CH}-\text{CH}-\text{O}-\text{C}-\text{C}(\text{CH}_3)$ ), 1.5 (h, k, m) (m, 4H,  $\text{CH}_2-\text{CH}_2-\text{CH}_2-\text{CH}(\text{CH}_2-\text{C})-\text{CH}-\text{O}-\text{C}=\text{O}$ ), 1.2 (e, i) (m, 4H,  $\text{CH}_2-\text{CH}_2-\text{CH}-\text{CH}(\text{CH}_3)-\text{O}-\text{C}=\text{O}$ ), 1.05 (j, g) (m, 2H,  $\text{CH}_2-\text{CH}_2-\text{CH}_2-\text{CH}-\text{CH}(\text{CH}_3)-\text{O}-\text{C}=\text{O}$ ), 0.95 (l) (s, 1H,  $\text{CH}(\text{CH}_2-\text{C})-\text{CH}-\text{O}-\text{C}=\text{O}$ ), 0.9 (n) (s, 6H,  $\text{C}(\text{CH}_3)_2$ ).

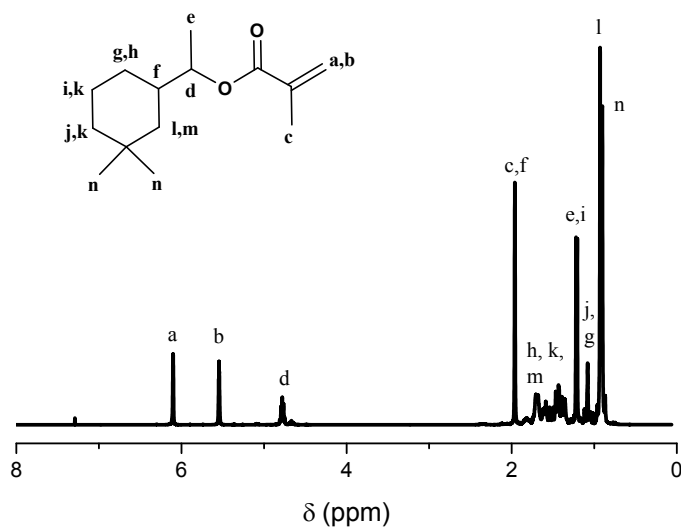

**Figure S2.**  $^1\text{H}$ -NMR of CDMMA monomer.

### Poly(THGMA)-*b*-poly(S) diblock copolymer in miniemulsion

The formulations utilized for the synthesis of all diblock copolymers are summarized in Table S1. A poly(THGMA) seed latex 10 wt% solids ( $[M]_0/[Dispolreg\ 007]_0 = 225$ ,  $M_{n,th} = 50\ 400\ g.mol^{-1}$ ) was first prepared via NMP in miniemulsion as described above. The reaction was stopped at 98 % monomer conversion, yielding a polymer with  $M_n = 50\ 000\ g.mol^{-1}$  and  $\bar{D} = 1.13$ . The poly(THGA) seed latex (25 g) was charged to the reactor equipped with rubber seals and magnetic stirring. Subsequently, the mixture of styrene monomer (3.5 g,  $[M]_0/[macro\ initiator\ agent]_0 = 672$ ) and acetone (10 wt.% b-o-m) was added to the reactor and stirred for 30 min before deoxygenation with purging nitrogen gas for an additional 30 min. The reactor was then placed into an oil bath at 97°C and left to polymerize for 8 hours. After polymerization, the reaction was cooled to room temperature.

**Table S1.** Recipes for synthesis the soft/hard diblock copolymer.

| Entry | macro-initiator<br>seed latex<br>(g) | Monomer | Monomer<br>(g) | Acetone<br>(10 wt.% b-o-m) |
|-------|--------------------------------------|---------|----------------|----------------------------|
| 14    | 25                                   | Styrene | 3.5            | 0.35                       |
| 15    | 25                                   | Styrene | 1.5            | 0.15                       |

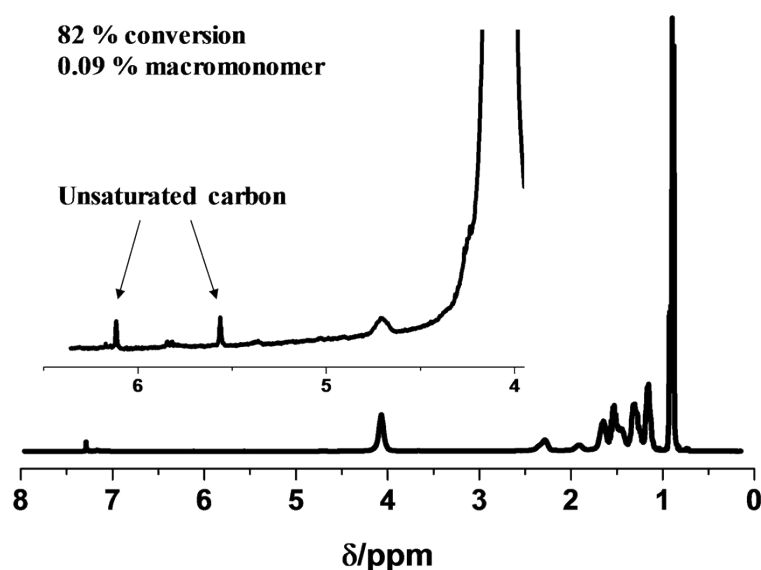

**Figure S3.**  $^1H$  NMR ( $CDCl_3$ , 400 MHz) of PTHGMA ( $[M]_0/[Dispolreg\ 007]_0 = 400$ ,  $M_n = 70\ 000\ g.mol^{-1}$ ,  $\bar{D} = 1.50$  at 82 % conversion) prepared by NMP in toluene at 97 °C.

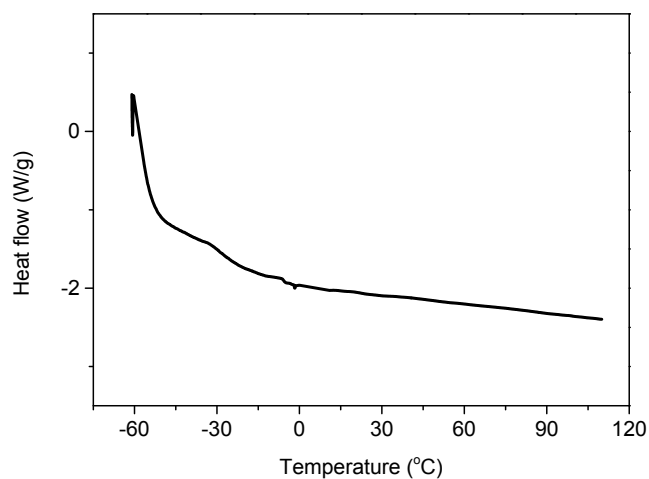

**Figure S4.** DSC thermogram of PTHGMA, ( $[M]_0/[Dispolreg\ 007]_0 = 400$ ,  $M_n = 70\ 000\ g.mol^{-1}$ ,  $D = 1.50$  at 82 % conversion) prepared by NMP in toluene at 97 °C

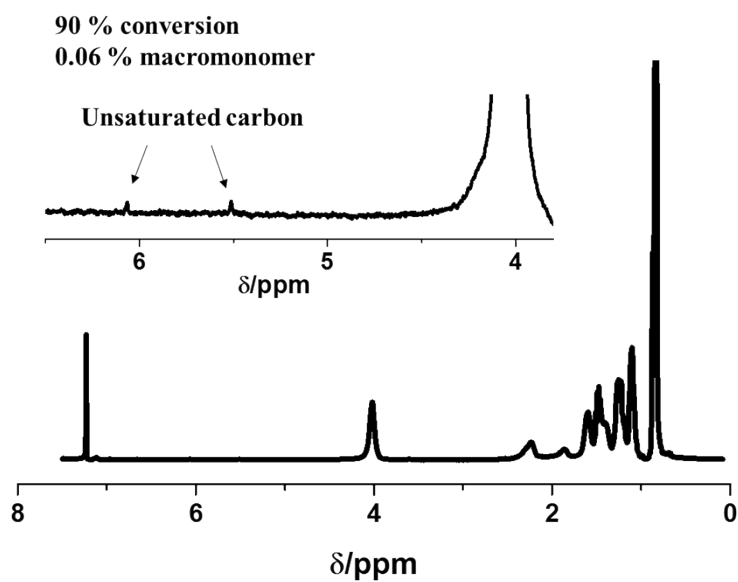

**Figure S5.**  $^1H$  NMR ( $CDCl_3$ , 400 MHz) of poly(THGMA) ( $[M]_0/[Dispolreg\ 007]_0 = 400$ ,  $M_n = 81700\ g.mol^{-1}$ , at 90 % conversion) prepared by NMP in miniemulsion at 97 °C.

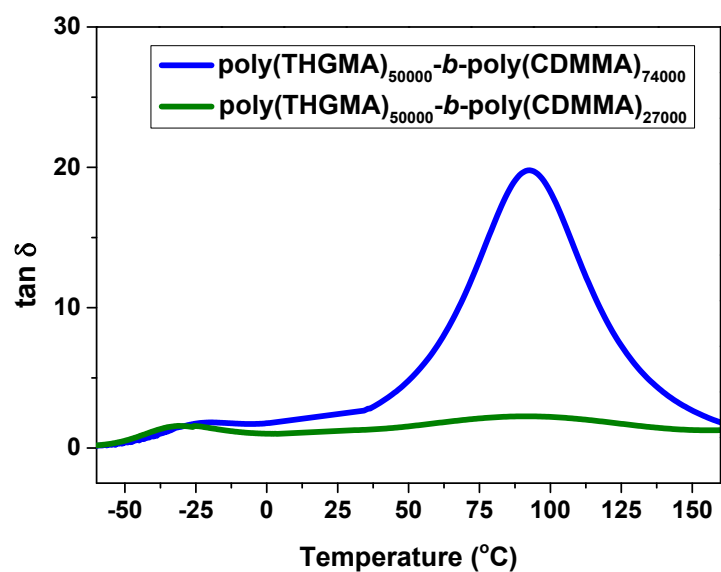

**Figure S6.** Evolution of  $\tan \delta$  as a function of increasing temperature of the PTHGMA-*b*-PCDMMA “soft”/“hard” diblock copolymers obtained from DMTA with temperature ranging from -60 to 160°C.

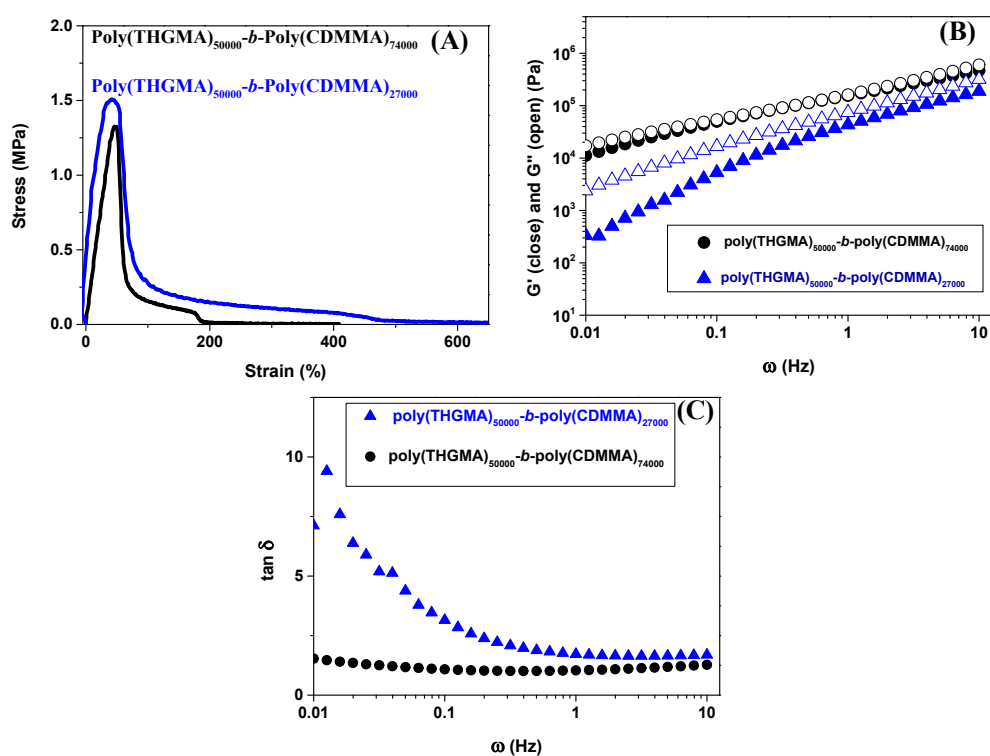

**Figure S7.** Evolution of adhesive properties for PTHGMA-*b*-PCDMMA diblock copolymer. (A) Stress-strain curve of the probe-tack test. (B)  $G'$  and  $G''$  as a function of frequency at room temperature. (C)  $\tan \delta$  as a function of frequency at 25 °C.

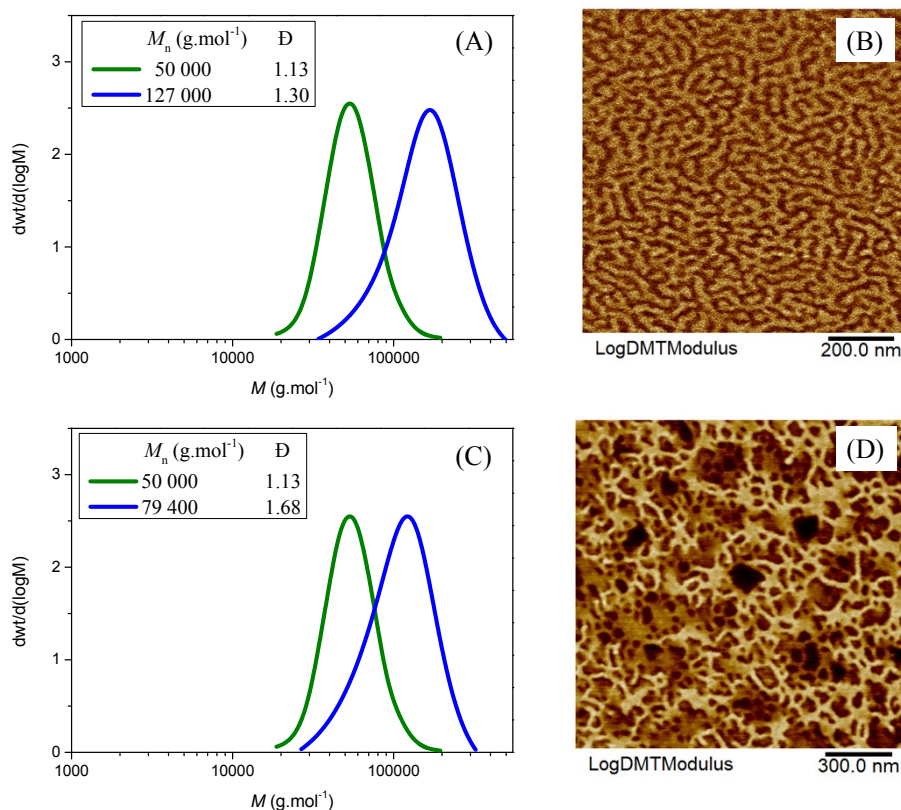

**Figure S8.** (A) SEC traces and (B) AFM picture of a poly(THGMA)<sub>50000</sub>-b-poly(styrene)<sub>77000</sub> diblock copolymer via chain extension of poly(THGMA) macro-initiator agent with styrene. (C) (A) SEC traces and (D) AFM picture of a poly(THGMA)<sub>50000</sub>-b-poly(styrene)<sub>25000</sub> AB diblock copolymer via chain extension of poly(THGMA) macro-initiator agent with styrene.

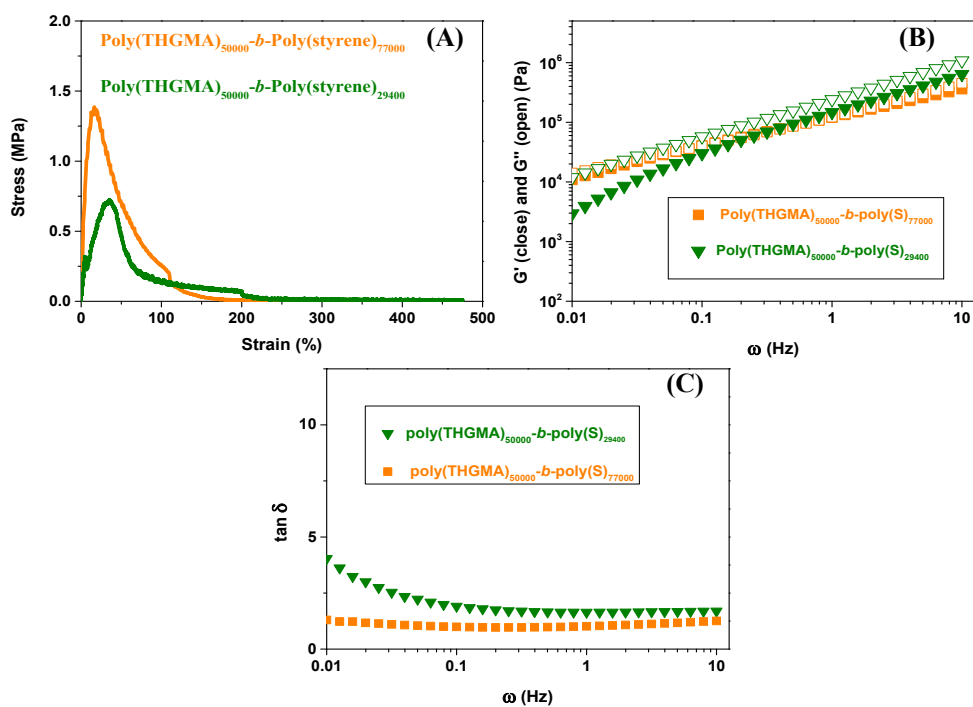

**Figure S9.** Evolution of adhesive properties for poly(THGMA)-b-poly(S) soft/hard diblock copolymer. (A) Stress-strain curve of the probe-tack test. (B)  $G'$  and  $G''$  as a function of frequency at room temperature. (C)  $\tan \delta$  as a function of frequency at room temperature.
